# Supplementary material for: Electrophilicity of aromatic triflones in σ-complexation processes
Source: Royal Society of Chemistry journal article supplement (doi:10.1039/b810273b), 2008-01-01
Supplement: b810273b.pdf [file b810273b.pdf]

SUPPLEMENTARY MATERIAL

Table S1. Observed first-order rate constants,  $k'_{\text{obsd}}$ , for formation of the 1,3-dimethoxy adduct **4b-Me** in methanol. <sup>a</sup>

| pH <sup>b</sup> | [MeO <sup>-</sup> ], mol dm <sup>-3</sup> | $k'_{\text{obsd}}$ , s <sup>-1</sup> |
|-----------------|-------------------------------------------|--------------------------------------|
| 11.72           | $1.10 \times 10^{-5}$                     | 9.09                                 |
| 12.02           | $2.19 \times 10^{-5}$                     | 13.36                                |
| 12.18           | $3.16 \times 10^{-5}$                     | 17.60                                |
| 12.26           | $3.80 \times 10^{-5}$                     | 16.20                                |
| 12.45           | $5.89 \times 10^{-5}$                     | 20.20                                |
| 12.68           | $1.00 \times 10^{-4}$                     | 31.80                                |
| 12.75           | $1.18 \times 10^{-4}$                     | 32.50                                |
| 12.89           | $1.62 \times 10^{-4}$                     | 50.20                                |
| 13.04           | $2.29 \times 10^{-4}$                     | 68.40                                |

(a) T = 20 °C, I = 0.01 mol dm<sup>-3</sup>; (b) pH = pK<sub>s</sub> + log[MeO<sup>-</sup>] + log γ<sub>±</sub> = 16.68 + log[MeO<sup>-</sup>]  
with pK<sub>s</sub> = 16.86 at 20°C. <sup>33,36</sup>

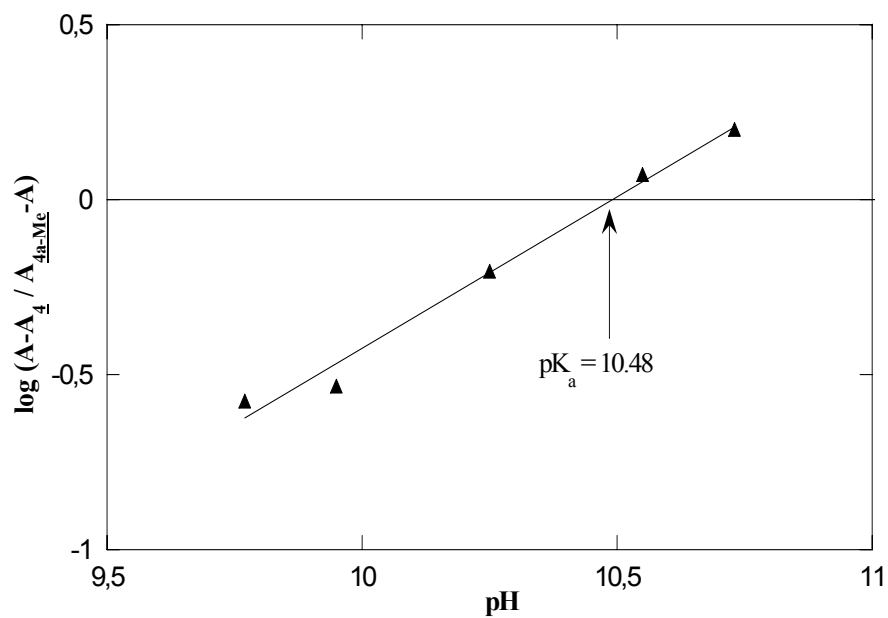

**Figure S1.** Effect of pH on the ionization ratio of **4** into the stable 1,1-adduct **4a-Me** at T = 20 °C in methanol.

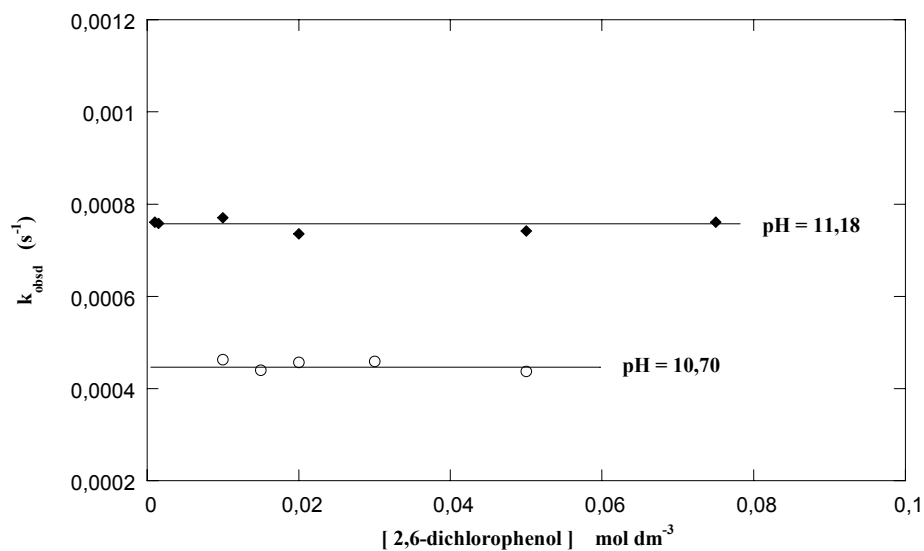

**Figure S2.** Plots showing the lack of dependence of the observed first-order rate constant  $k'_{\text{obsd}}$  for formation of the 1,1-adduct **4a-Me** on the 2,6-dichlorophenol buffer concentration at pH = 10.70 and pH = 11.18. ( T = 20 °C in methanol).

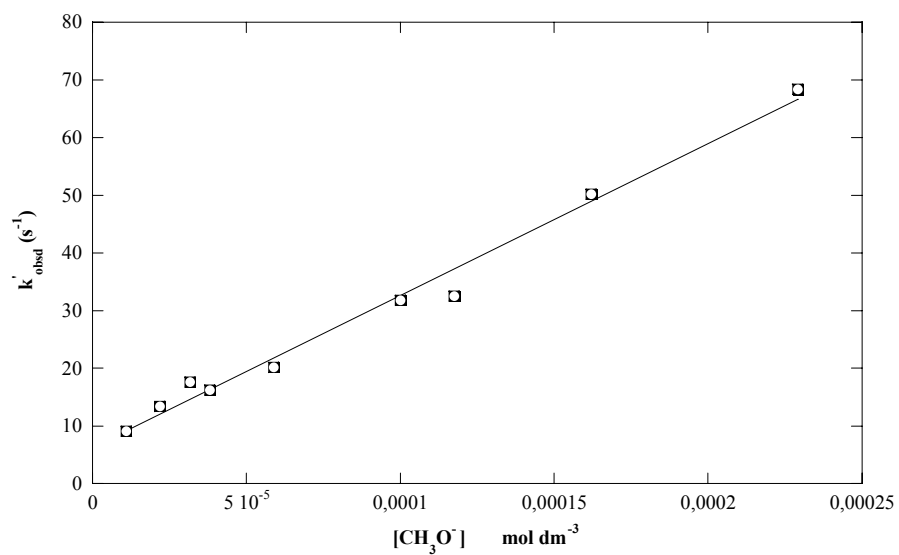

**Figure S3.** Influence of the MeO<sup>-</sup> concentration on the observed first-order rate constant  $k'_{\text{obsd}}$  for formation of the 1,3-dimethoxy adduct **4b-Me** at pH  $\geq$  10.7 and T = 20 °C in methanol.
